# Supplementary material for: Efficient reduction of graphene oxide using Tin-powder and its electrochemical performances for use as an energy storage electrode material
Source: Royal Society of Chemistry journal article supplement (doi:10.1039/c3ta11987d), 2013-01-01
Supplement: c3ta11987d.pdf [file c3ta11987d.pdf]

## Efficient reduction of graphene oxide using Tin-powder and its electrochemical performances for energy storage electrode material

Nam Hoon Kim,<sup>a</sup> Partha Khanra,<sup>a</sup> Tapas Kuila,<sup>b</sup> Joong Hee Leea,<sup>c,d\*</sup>

<sup>a</sup>WCU Program, Department of BIN Fusion Technology, Chonbuk National University,  
 Jeonju, Jeonbuk, 561-756, Republic of Korea

<sup>b</sup>Surface Engineering & Tribology Division, CSIR-Central Mechanical Engineering Research  
 Institute, Council of Scientific & Industrial Research (CSIR), Mahatma Gandhi Avenue,  
 Durgapur -713209, India

<sup>c</sup>BIN Fusion Research Center, Department of Polymer & Nano Engineering, Chonbuk  
 National University, Jeonju, Jeonbuk, 561-756, Republic of Korea

<sup>d</sup>Department of Hydrogen and Fuel Cell Engineering, Chonbuk National University, Jeonju,  
 Jeonbuk, 561-756, Republic of Korea.

\*Correspondence to: Prof. Joong Hee Lee( [jhl@jbnu.ac.kr](mailto:jhl@jbnu.ac.kr))

**Table S1** Comparison of properties of reduced GOs produced by various reducing agents

| Reducing agent                                         | Temperature (°C) | Reduction Time               | C:O ratio by XPS (atomic ratio) | Electrical conductivity (S m <sup>-1</sup> ) | Specific capacitance (F g <sup>-1</sup> ) | Reference No |
|--------------------------------------------------------|------------------|------------------------------|---------------------------------|----------------------------------------------|-------------------------------------------|--------------|
| Al(powder)/ HCl                                        | RT               | 30 min                       | 18.6                            | 2,100                                        | -----                                     | 1            |
| Al(foil)/HCl                                           | RT               | 6 h                          | 21.11                           | 12,530                                       | -----                                     | 2            |
| Al(foil)/NaOH                                          | RT               | 30 min                       | 5.35                            | 1,120                                        | -----                                     | 2            |
| Fe(powder)/ HCl                                        | RT               | 6 h                          | 7.9                             | 2,300                                        | -----                                     | 3            |
| Zn(powder)/ ammonia                                    | RT               | 10 min                       | 8.05                            | 2,160                                        | 116<br>at 0.05 A g <sup>-1</sup>          | 4            |
| Zn(filings)/H <sub>2</sub> SO <sub>4</sub>             | RT               | 2 h                          | 21.2                            | 3,416                                        | 176                                       | 5            |
| Zn(powder)/NaOH                                        | RT               | 20 min                       | 17.96                           | 7,540                                        | -----                                     | 2            |
| Zn(powder)/ neutral solutions in the presence of EDTA* | RT               | 1 min<br>Ultrasonic<br>ation | 33                              | 14,200                                       | -----                                     | 6            |
| Zn(powder)/NaOH                                        | RT               | 1 min<br>Ultrasonic<br>ation | 31.2                            | 13,500                                       | -----                                     | 6            |
| Zn(powder)/NaOH                                        | RT               | 6 h                          | 6.02                            |                                              | -----                                     | 7            |
| Zn(powder)/NaOH                                        | 100              | 6 h                          | 7.39                            |                                              | -----                                     | 7            |
| Zn(powder)/HCl                                         | RT               | 30 min                       | 8.2                             | 650                                          | -----                                     | 8            |
| Ni(powder)/HCl                                         | RT               | 24 h                         |                                 |                                              | -----                                     | 9            |
| Mg(ribbons )/HCl                                       | RT               | 5 min                        |                                 | 10.12                                        | -----                                     | 10           |
| NaBH <sub>4</sub>                                      | RT               | 2 h                          | 8.6                             | 45                                           | -----                                     | 11           |
| Hydrazine hydrate                                      | 100              | 24 h                         | 10.3                            | ~200                                         | -----                                     | 12           |

|                               |       |        |       |         |                     |                 |
|-------------------------------|-------|--------|-------|---------|---------------------|-----------------|
| Solvothermal Sodium + ethanol | 220   | 72 h   | 6.4   | 0.05    | -----               | 13              |
| HI                            | 100   | 1h     | 12    | 298     | -----               | 14              |
| Hydrohalic acids              | 450   | 2 h    | 10.8  | 100,000 | -----               | 15              |
| Reduction with H <sub>2</sub> | 35-40 | 72 h   | 5.9   | 43      | -----               | 16              |
| Yeast                         | 80    | 2 h    | 5.6   | 0.783   | -----               | 17              |
| Polyethylene imine            | 95    | -----  | 12.5  | 7,700   | -----               | 18              |
| Vitamin C                     | 100   | 5 days | 6.9   | 1,019   | 2.8                 | 19              |
| Isopropanol                   | 100   | 5 days | 30    | 4,600   | 35                  | 19              |
| Benzyl alcohol                | RT    | 12 h   | 11.14 |         | -----               | 20              |
| Glycine                       | 90    | 24 h   | 7.4   | 1,500   | -----               | 21              |
| P-phenylene diamine           | RT    | 72 h   | 11.9  |         | -----               | 22              |
| Wild carrot                   | 95    | 12 h   | 7.7   | 45      | -----               | 23              |
| Pyrrrole                      | 90    | 1 h    | 9.7   | 1,122   | -----               | 24              |
| Hydroxyl amine                | RT    | 48 h   | ----- | 800     | -----               | 24              |
| L-ascorbic acid               | 50    | 3 h    | 6.1   | 8,650   | 152 at 1.5 A<br>g-1 | Current<br>work |

\* EDTA refers Ethylenediaminetetraacetic acid and RT represents room temperature.

**Table S2** Comparative electrochemical performances of various reduced GOs, surface modified graphene and graphene/conducting polymer composites

| Materials                                                | Specific capacitance                                                                                             | Charge-discharge cyclic stability/Retention | References |
|----------------------------------------------------------|------------------------------------------------------------------------------------------------------------------|---------------------------------------------|------------|
| Zn reduced GO                                            | 116 F g <sup>-1</sup> at 0.05 A g <sup>-1</sup>                                                                  | -----                                       | 4          |
| Zn reduced GO                                            | 176 F g <sup>-1</sup>                                                                                            | -----                                       | 5          |
| Dimethyl ketoxime reduced GO                             | 141 F g <sup>-1</sup> at 3 A g <sup>-1</sup>                                                                     | 96% after 1500 cycles                       | 25         |
| Aqueous phytoextracts reduced GO                         | 21(±2) F g <sup>-1</sup> for ORGO,<br>18(±2) F g <sup>-1</sup> for MRGO<br>17(±1.5) F g <sup>-1</sup> for CRGO** | -----                                       | 26         |
| Hydrazine monohydrate reduced GO                         | 101 F g <sup>-1</sup> at 20 mV s <sup>-1</sup><br>97 F g <sup>-1</sup> at 400 mV s <sup>-1</sup>                 | -----                                       | 27         |
| Annealing at 150 °C for 12 h                             | 72 F g <sup>-1</sup> at 5 A g <sup>-1</sup>                                                                      | 82% after 1500 cycles                       | 28         |
| Alcohols reduced GO                                      | 35 F g <sup>-1</sup> at 25 mV s <sup>-1</sup>                                                                    | -----                                       | 19         |
| Thermally reduced GO                                     | 48 to 132 F g <sup>-1</sup> at a scan rate of 0.5 to 0.01 V s <sup>-1</sup>                                      | -----                                       | 29         |
| Hydrazine reduced GO                                     | 133 F g <sup>-1</sup> at 1 A g <sup>-1</sup>                                                                     | -----                                       | 30         |
| Electrochemically-reduced GO                             | 128 F g <sup>-1</sup>                                                                                            | 86% after 3500 cycles                       | 31         |
| Thermally exfoliated and reduced GO                      | 117 F g <sup>-1</sup> in aq. H <sub>2</sub> SO <sub>4</sub><br>75 F g <sup>-1</sup> in ionic liquid              | -----                                       | 32         |
| low-temperature (as low as 200 °C) reduced GO            | 122 F g <sup>-1</sup> at 100 mA g <sup>-1</sup>                                                                  | -----                                       | 33         |
| 9-anthracene carboxylic acid functionalized graphene     | 148 F g <sup>-1</sup>                                                                                            | -----                                       | 34         |
| Sulfonated poly(ether-ether-ketone)                      | 476 F g <sup>-1</sup> at 6.6 A g <sup>-1</sup>                                                                   | -----                                       | 35         |
| KOH activated graphene sheets                            | 136 F g <sup>-1</sup> at 10 mVs <sup>-1</sup>                                                                    | -----                                       | 36         |
| Primary amine (Ethylene glycol)                          | 187.6 F g <sup>-1</sup> at 0.8 A g <sup>-1</sup>                                                                 | 60% after 1000 cycles                       | 37         |
| Reduced GO/polypyrrole composite                         | 224 F g <sup>-1</sup> at 240 Ag <sup>-1</sup>                                                                    | 83% after 5000 cycles                       | 38         |
| Multilayered nanoarchitecture of graphene nanosheets and | 165 F g <sup>-1</sup> at 1 A g <sup>-1</sup>                                                                     | 92% after 5000 cycles                       | 39         |

---

|                                                                                  |                                                 |                          |              |
|----------------------------------------------------------------------------------|-------------------------------------------------|--------------------------|--------------|
| polypyrrole nanowires                                                            |                                                 |                          |              |
| Graphene-polypyrrole nanocomposite                                               | 267 F g <sup>-1</sup> at 100 mV s <sup>-1</sup> | 90% after 500 cycles     | 40           |
| Sandwich-like polyaniline/graphene composite                                     | 377 F g <sup>-1</sup> at 100 mV s <sup>-1</sup> | 50.9 % after 1000 cycles | 41           |
| Electrophoretic deposition method to make the graphene nanosheets on nickel foam | 100 F g <sup>-1</sup> at 6 A g <sup>-1</sup>    | 61% after 700 cycles     | 42           |
| Free-standing graphene/polyaniline nanofibers PSS-GS/PANi (10%)                  | 301 F g <sup>-1</sup>                           | 67% after 400 cycles     | 43           |
| Sn-reduced GO at 50 °C                                                           | 152 F g <sup>-1</sup> at 1.5 A g <sup>-1</sup>  | 92% after 1500 cycles    | Current work |

---

\*\*MRGO and ORGO represent *M. ferrea* Linn. leaf aqueous extract reduced GO and *C. sinensis* peel aqueous extract reduced GO, respectively. CRGO represents *C. esculenta* leaf aqueous extract reduced GO

## References

1. Z. Fan, K. Wang, T. Wei, J. Yan, L. Song and B. Shao, *Carbon*, 2010, **48**, 1686-1689.
2. V.H. Pham, H.D. Pham, T. T. Dang, S. H. Hur, E. J. Kim, B. S. Kong, S. Kim and J. S. Chung, *J. Mater. Chem.*, 2012, **22**, 10530-10536.
3. Z. Fan, W. Kai, J. Yan, T. Wei, L.J. Zhi, J. Feng, Y. M. Ren, L. P. Song and F. Wei, *ACS Nano*, 2011, **5**, 191-198
4. Y. Liu, Y. Li, M. Zhong, Y. Yang, Y. Wen, M. Wang. *J. Mater. Chem.*, 2011, **21**, 15449-15455.
5. R. S. Dey, S. Hajra, R. K. Sahu, C. R. Raj and M. K. Panigrahi, *Chem. Commun.*, 2012, **48**, 1787-1789.
6. X. Mei, H. Zheng and J. Ouyang, *J. Mater. Chem.*, 2012, **22**, 9109-9116.
7. S. Yang, W. Yue, D. Huang, C. Chen, H. Lin and X. Yang, *RSC Advances*, 2012, **2**, 8827-8832.
8. P. Liu, Y. Huang and L. Wang, *Materials Letters*, 2013, **91**, 125-128

9. R. Krishna, E. Titus, L. C. Costa, J. C. J. M. D. S. Menezes, M. R. P. Correia, S. Pinto, J. Ventura, J. P. Araujo, J. A. S. Cavaleiro and J. J. A. Gracio, *J. Mater. Chem.*, 2012, **22**, 10457-10459.
10. B. K. Barman, P. Mahanandia, and K. K. Nanda, *RSC Adv.*, 2013, **3**, 12621-12624.
11. H.-J. Shin, K. K. Kim, A. Benaya, S.-M. Yoon, H. K. Park, I.-S. Jung, M. H. Jin, H.-K. Jeong, J. M. Kim, J.-Y. Choi, and Y. H. Lee, *Adv. Func. Mater.* 2009, **19**, 1987-1992.
12. S. Stankovich, D. A. Dikin, R. D. Piner, K. A. Kohlhaas, A. Kleinhammes, Y. Jia, Y. Wu, S. T. Nguyen and R. S. Ruoff, *Carbon*, 2007, **45**, 1558-1565.
13. M. Choucair, P. Thordarson and J. A. Stride, *Nat. Nanotechnol.* 2009, **4**, 30-33.
14. S. Pei, J. Zhao, J. Du, W. Ren and H.-M. Cheng, *Carbon*, 2010, **48**, 4466-4474.
15. Z.-S. Wu, W. Ren, L. Gao, B. Liu, C. Jiang, H.-M. Cheng, *Carbon*, 2009, **47**, 493-499.
16. P. Khanra, T. Kuila, N. H. Kim, S. H. Bae, D.-S. Yu and J. H. Lee, *Chem. Eng. J.* 2012, **183**, 526- 533.
17. H. Liu, T. Kuila, N. H. Kim, B.-C. Ku and J. H. Lee, *J. Mater. Chem. A*, 2013, **1**, 3739-3746.
18. M. J. F. Merino, L. Guardia, J. I. Paredes, S. V. Rodil, P. S. Fernandez, A. M. Alonso, and J. M. D. Tascon, *J. Phys. Chem. C*, 2010, **114**, 6426-6432.
19. D. R. Dreyer, S. Murali, Y. Zhu, R. S. Ruoff and C. W. Bielawski, *J. Mater. Chem.*, 2011, **21**, 3443-3447.
20. S. Bose, T. Kuila, A. K. Mishra, N. H. Kim and J. H. Lee, *J. Mater. Chem.*, 2012, **22**, 9696-9703.
21. Y. Chen, X. Zhang, P. Yu and Y. Ma, *Chem. Commun.*, 2009, 4527-4529.
22. T. Kuila, S. Bose, P. Khanra, A. K. Mishra, N. H. Kim and J. H. Lee, *Carbon*, 2012, **50**, 914-921.
23. C. A. Amarnath, C. E. Hong, N. H. Kim, B.-C. Ku and J. H. Lee, *Carbon*, 2011, **49**, 3497-3502.
24. X. Zhou, J. Zhang, H. Wu, H. Yang, J. Zhang and S. Guo, *J. Phys. Chem. C*, 2011, **115**, 11957-11961.
25. P. Su, H.-L. Guo, L. Tian and S.-K. Ning, *Carbon* 2012, **50**, 5351-5358.
26. S. Thakur and N. Karak, *Carbon*, 2012, **50**, 5331-5339.

27. M. D. Stoller, S. Park, Y. Zhu, J. An, and Rodney S. Ruoff, *Nano Lett.*, 2008, **8**, 3498-3502.
28. K. Ku, B. Kim, H. Chung and W. Kim, *Synthetic Met.*, 2010, **160**, 2613-2617.
29. L. T. Le, M. H. Ervin, H. Qiu, B. E. Fuchs and W. Y. Lee, *Electrochem. Commun.*, 2011, **13**, 355-358.
30. N. Xiao, D. Lau, W. Shi, J. Zhu, X. Dong, H. H. Hng and Q. Yan, *Carbon*, 2013, **57**, 184-190.
31. X.-Y. Peng, X.-X. Liu, D. Diamond and K. T. Lau, *Carbon*, 2011, **49**, 3488-3496.
32. S. R. C. vivekchand, C. S. Rout, K. S. Subrahmanyam, A. Govindaraj and C. N. R. Rao, *J. Chem. Sci.*, 2008, **120**, 9-13.
33. W. Lv, D.-M. Tang, Y.-B. He, C.-H. You, Z.-Q. Shi, X.-C. Chen, C.-M. Chen, P.-X. Hou, C. Liu and Q.-H. Yang, *ACS Nano*, 2009, **3**, 3730-3736.
34. S. Bose, T. Kuila, A. K. Mishra, N. H. Kim and J. H. Lee, *Nanotechnology*, 2011, **22**, 405603.
35. T. Kuila, A. K. Mishra, P. Khanra, N. H. Kim, M. E. Uddin and J. H. Lee, *Langmuir*, 2012, **28**, 9825-9833.
36. Y. Li, M. v. Zijll, S. Chiang and N. Pan, *J. Power Sources*, 2011, **196**, 6003-6006.
37. L. Lai, L. Chen, D. Zhan, L. Sun, J. Liu, S. H. Lim, C. K. Poh, Z. Shen, J. Lin, *Carbon*, 2011, **49**, 3250-3257.
38. J. Wang, Y. Xu, J. Zhu and P. Ren, *J. Power Sources*, 2012, **208**, 138-143.
39. S. Biswas and L. T. Drzal, *Chem. Mater.*, 2010, **22**, 5667-5671.
40. S. Bose, N. H. Kim, T. Kuila, K.-T. Lau and J. H. Lee, *Nanotechnology* 2011, **22**, 295202.
41. Y. Li, H. Peng, G. Li and K. Chen, *Eur. Polym. J.* 2012, **48**, 1406-1412.
42. J. Yan, T. Wei, Z. n Fan, W. Qian, M. Zhang, X. Shen and F. Wei, *J. Power Sources*, 2010, **195**, 3041-3045.
43. S. Liu, X. Liu, Z. Li, S. Yang and J. Wang, *New J. Chem.*, 2011, **35**, 369-374.
